# Supplementary material for: RFID wireless door system
Source: MDPI journal article supplement (doi:10.3390/nano11092225), 2008-11-01
Supplement: s1 [file s1]

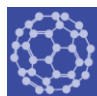

## Supplementary Materials

# Stable Thermally-Modulated Nanodroplet Ultrasound Contrast Agents

Anastasiia Vasiukhina <sup>1</sup>, Javad Eshraghi <sup>2</sup>, Adib Ahmadzadegan <sup>2</sup>, Craig J. Goergen <sup>1,3</sup>, Pavlos P. Vlachos <sup>2,\*</sup> and Luis Solorio <sup>1,3,\*</sup>

<sup>1</sup> Weldon School of Biomedical Engineering, Purdue University, West Lafayette, IN 47907, USA; avasiukh@purdue.edu (A.V.); cgoergen@purdue.edu (C.J.G.)

<sup>2</sup> School of Mechanical Engineering, Purdue University, West Lafayette, IN 47907, USA; jeshragh@purdue.edu (J.E.); aahmadza@purdue.edu (A.A.); pvlachos@purdue.edu (P.P.V.)

<sup>3</sup> Center for Cancer Research, Purdue University, West Lafayette, IN 47907, USA

\* Correspondence: lsolorio@purdue.edu

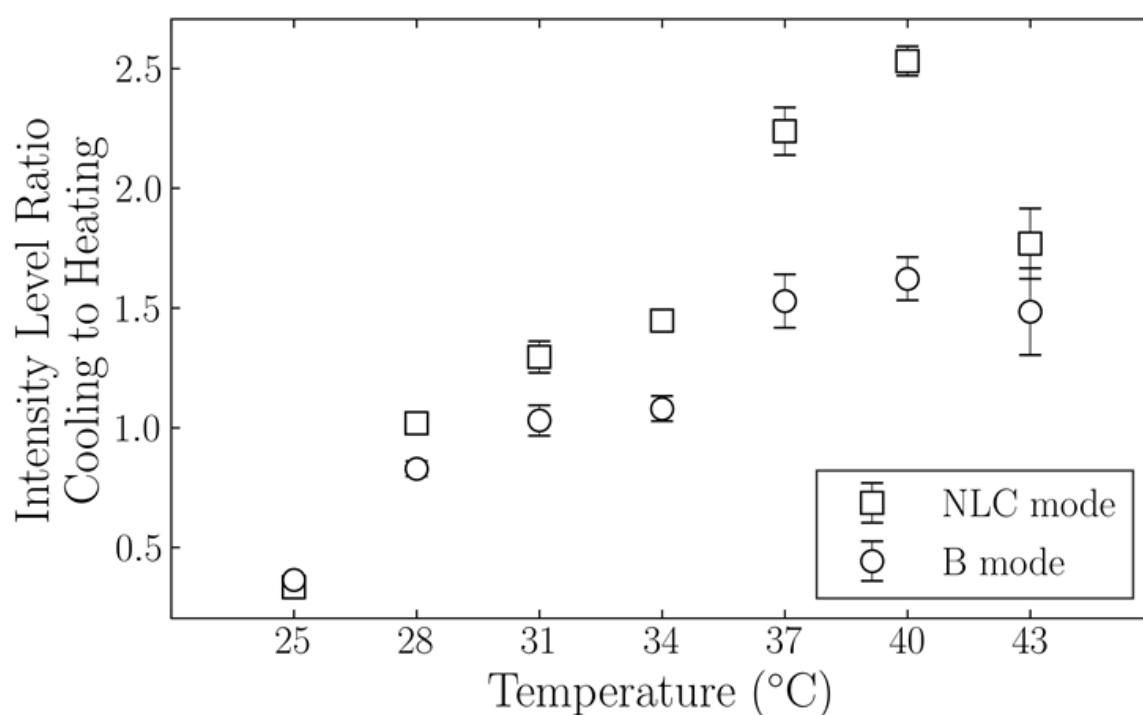

**Figure S1.** The ratio of nanodroplet signal intensity during cooling and heating portions of the thermal cycle for selected temperature points.
